# Supplementary material
Source: PubMed Central journal article supplement (PMC6842112)
Supplement: NIHMS1536008-supplement-1.pdf [file NIHMS1536008-supplement-1.pdf]

### A Premotor Laser

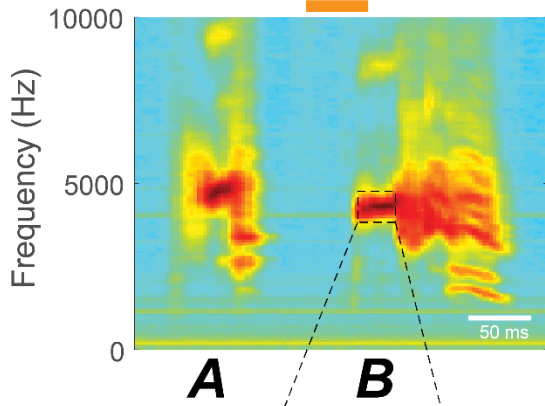

### B Feedback Laser

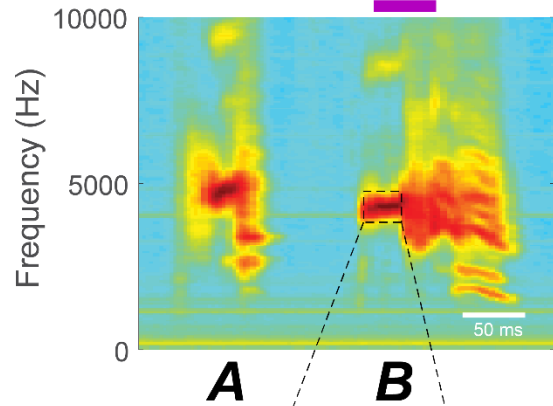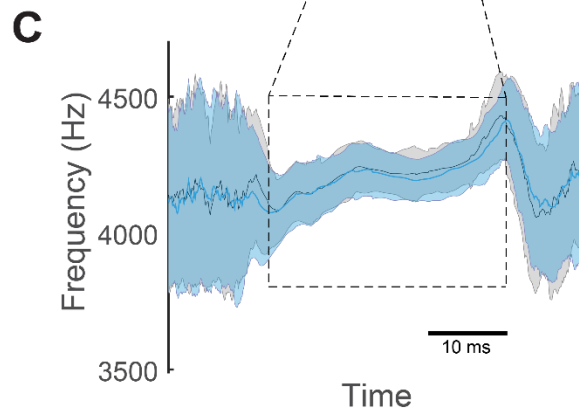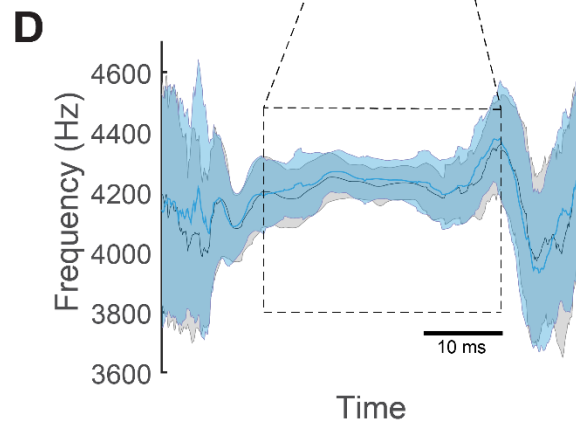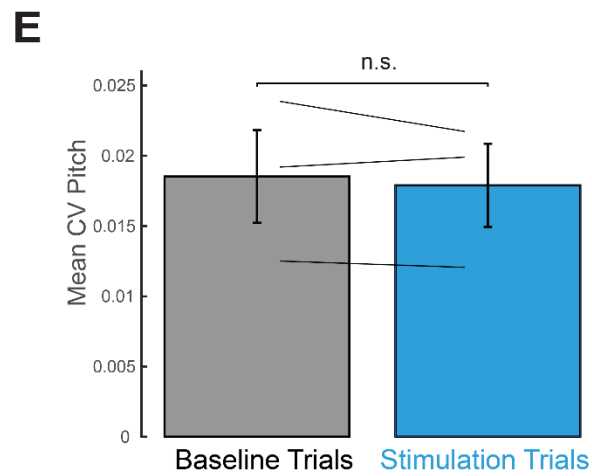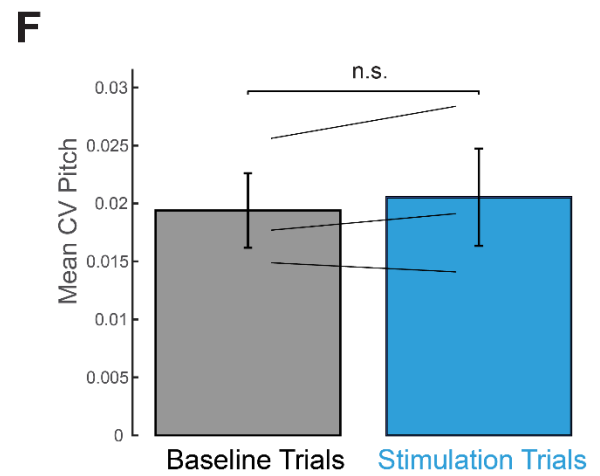

**Supplementary Figure 1: Stimulation of Aiv<sub>VTA</sub> terminals does not have acute effects on song motor production., Related to Figure 2** (A) Spectrogram showing two syllables of song, Syllable *B* is targeted to receive premotor Aiv<sub>VTA</sub> laser stimulation on a random 50% of renditions throughout the day. (B) Same as in A but for feedback stimulation delivered 50 ms later. (C) Contour plot demonstrating the mean and standard deviation of pitch of syllable *B* on 50% of trials that receive laser stimulation (blue) and 50% of trials that do not receive laser stimulation (catch trials, gray). (D) Same as in C except for feedback stimulation. (E) Bar graph of mean CV pitch showing no significant changes with premotor Aiv<sub>VTA</sub> stimulation (n = 3 syllables, n = 3 birds, p = 0.5268, paired t test). (F) Bar graph of mean CV pitch showing no significant changes with auditory feedback Aiv<sub>VTA</sub> stimulation (n = 3 syllables, n = 3 birds, p = 0.3873, paired t test).

### A Premotor Laser

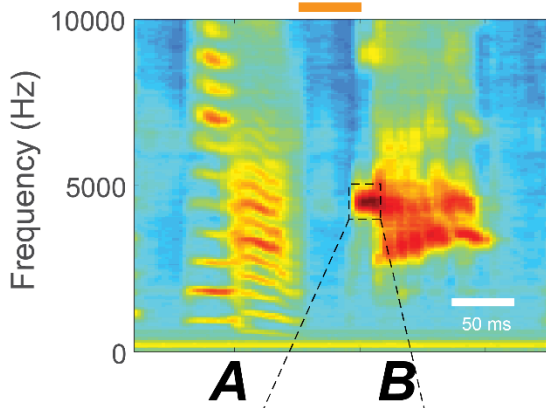

### B Feedback Laser

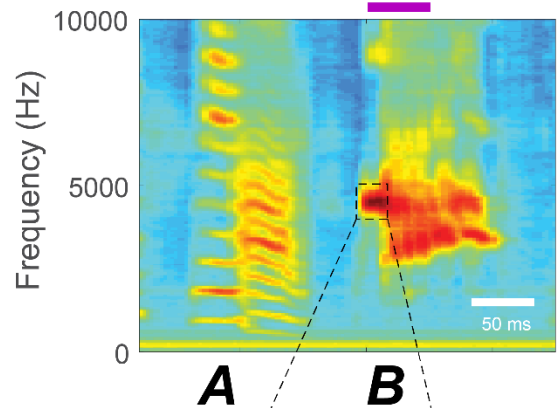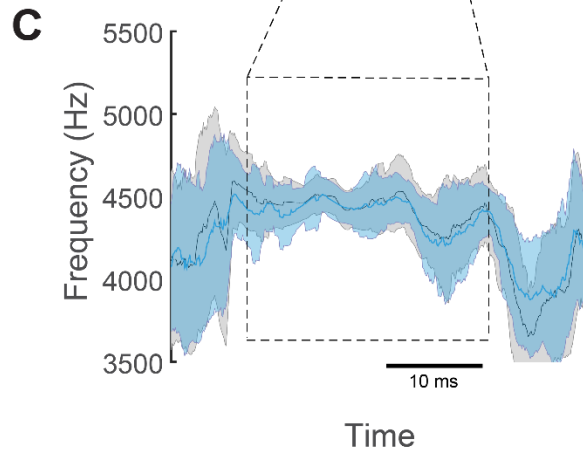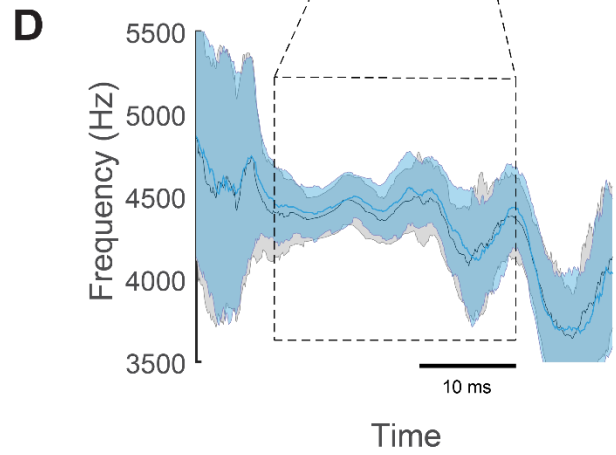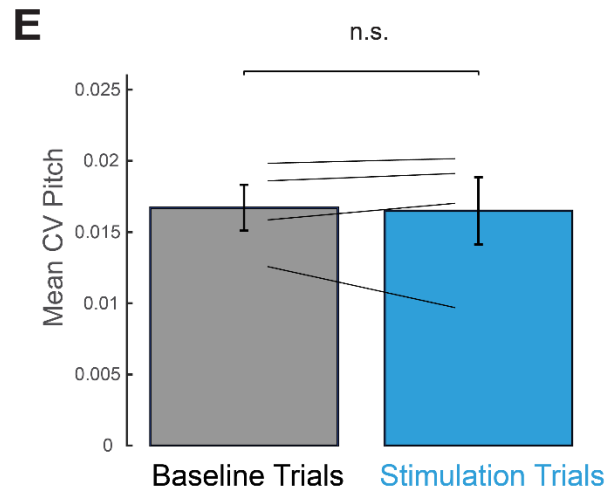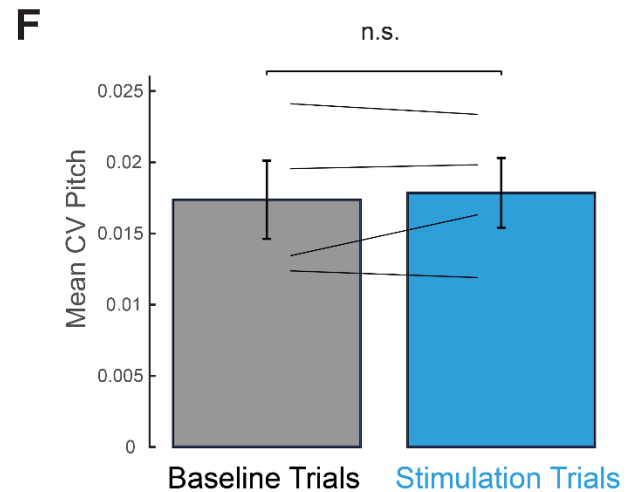

**Supplementary Figure 2: Stimulation of VP<sub>VTA</sub> terminals does not have acute effects on song motor production., Related to Figure 2** (A) Spectrogram showing two syllables of song, Syllable B is targeted to receive premotor VP<sub>VTA</sub> laser stimulation on a random 50% of renditions throughout the day. (B) Same as in A but for feedback stimulation delivered 50 ms later. (C) Contour plot demonstrating the mean and standard deviation of pitch of syllable *B* on 50% of trials that receive laser stimulation (blue) and 50% of trials that do not receive laser stimulation (catch trials, gray). (D) Same as in C except for feedback stimulation. (E) Bar graph of mean CV pitch showing no significant changes with premotor VP<sub>VTA</sub> stimulation (n = 4 syllables, n = 4 birds, p = 0.8247, paired t test). (F) Bar graph of mean CV pitch showing no significant changes with auditory feedback VP<sub>VTA</sub> stimulation (n = 4 syllables, n = 4 birds, p = 0.5996, paired t test).

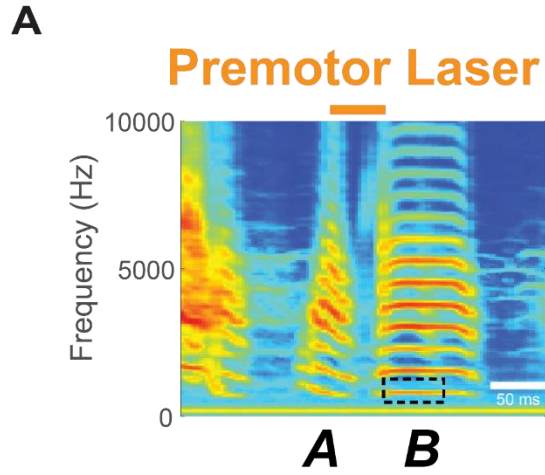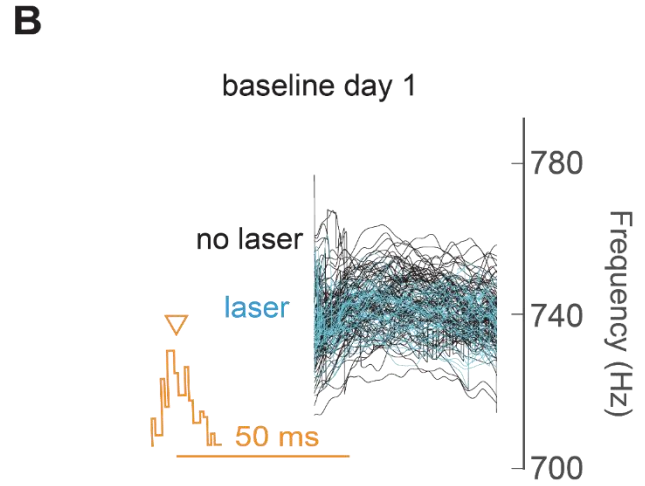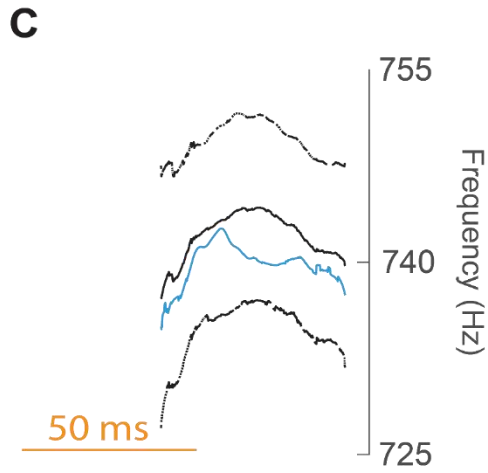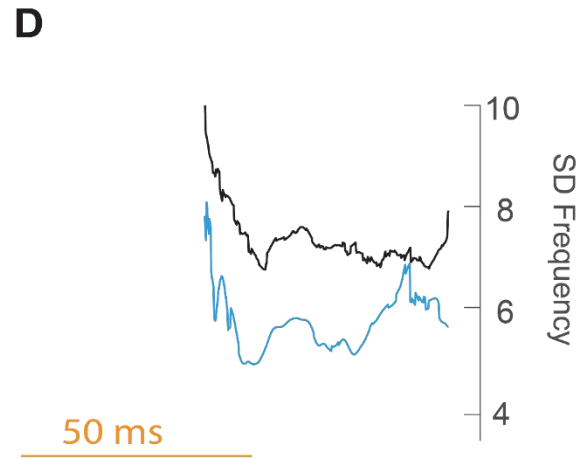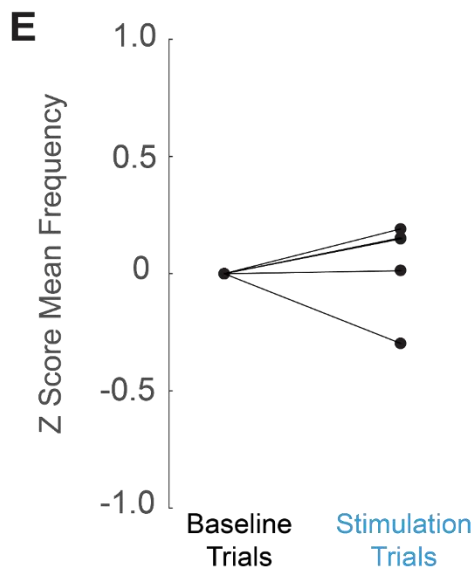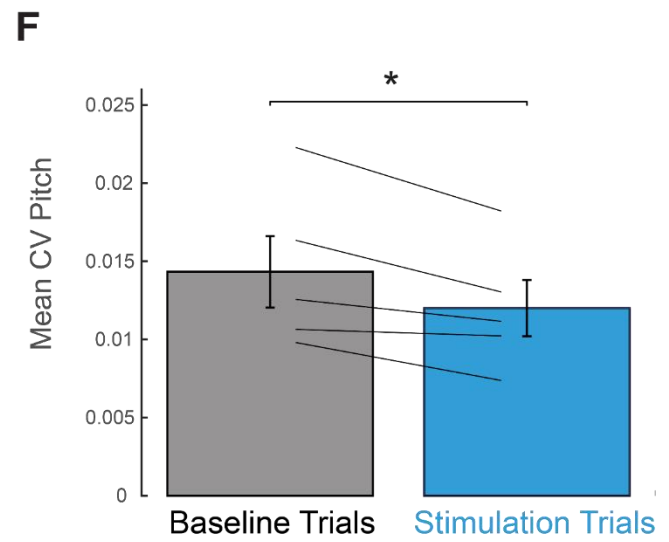

**Supplementary Figure 3: Stimulation of LMAN can acutely effect song motor production., Related to Figure 3** (A) Spectrogram showing two syllables of song, Syllable *B* is targeted to receive premotor LMAN laser stimulation randomly on a subset of renditions throughout the day. (B) Contour plot demonstrating raw contours of syllable *B* on 50% of trials that receive laser (blue) and 50% of trials that do not receive laser (catch trials, gray) (orange histogram shows jitter in onset of laser with mean shown with triangle.) (C) Mean pitch and one standard deviation above and below on non-stimulation “catch” trials. Mean pitch on laser trials (blue) (D) Plot of standard deviation of pitch for no laser (black) and laser stimulation (blue) trials. (E) Z score change in mean frequency with laser stimulation (blue). (F) Bar graph of mean CV pitch showing small but significant decreases with laser stimulation ( $n = 5$  syllables,  $n = 5$  birds,  $p = 0.0234$ , paired t test).

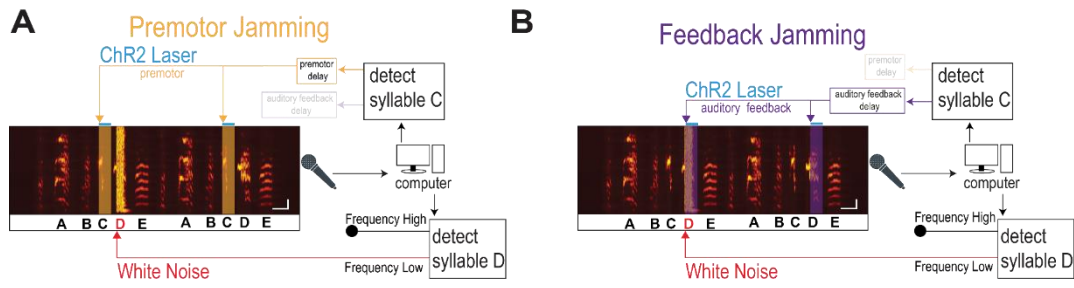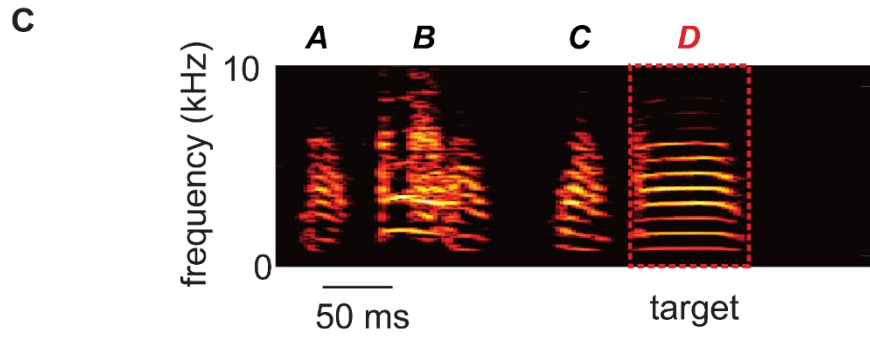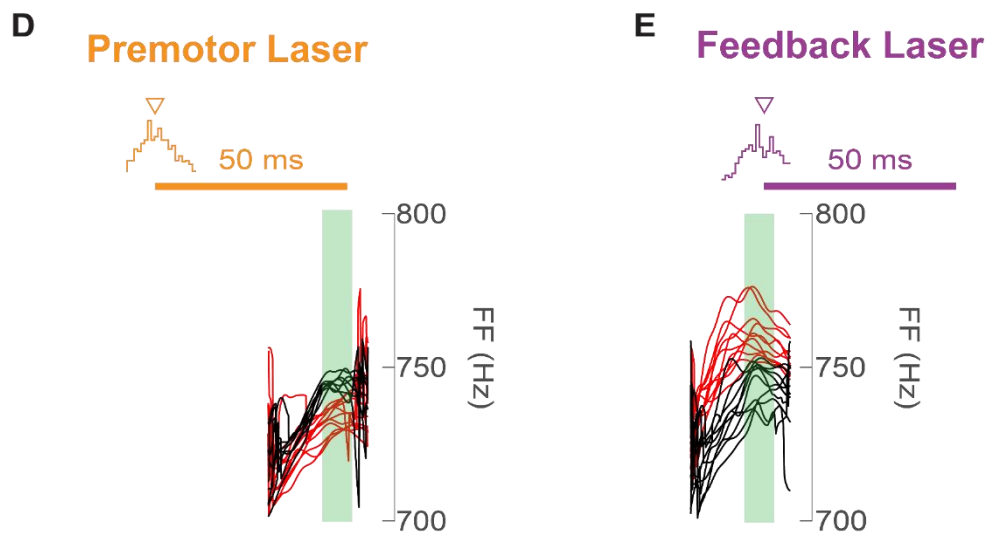

**Supplementary Figure 4: Sensitivity and specificity of online dual syllable detection for independent optical and auditory stimulus delivery., Related to**

**Figure 3** (A) Schematic of dual syllable targeting optogenetic interference experiment, auditory feedback white noise is delivered in a pitch contingent fashion to syllable D while syllable C is used to trigger a laser on every trial to disrupt neural activity during a premotor production period relative to the production syllable D. (B) Schematic of dual syllable targeting optogenetic interference experiment: auditory feedback white noise is delivered in a pitch contingent fashion to syllable D while syllable C is used to trigger a laser on every trial to disrupt neural activity during a auditory feedback evaluation period relative to the production syllable D. (C) Spectrogram of song of bird used in LMAN (D) Contours of early trials (black) and late trials (red) on premotor jamming day, green box shows where pitch is measured. Histogram of premotor laser stimulation timing mean onset is 49.3 ms prior to pitch measurement (green box), standard deviation is 9.3 ms. (E) Contours of first early trials (black) and late trials (red) on auditory feedback jamming day, green box shows where pitch is measured. Histogram of premotor laser stimulation timing mean onset is 5.6 ms after pitch measurement (green box), standard deviation is 10.5 ms.



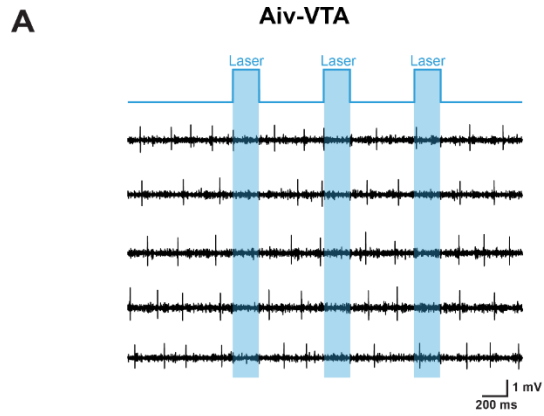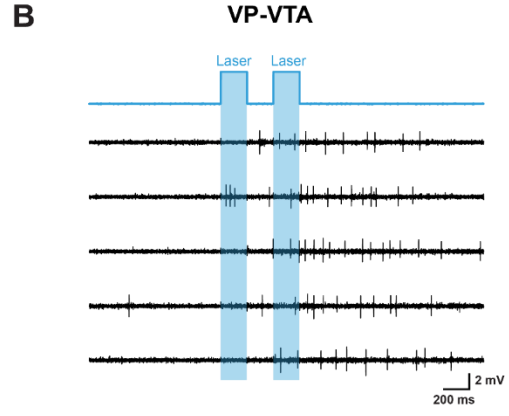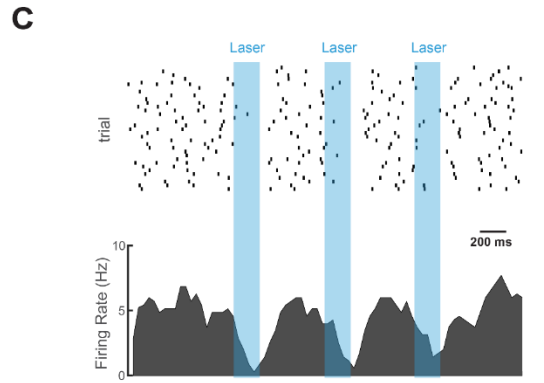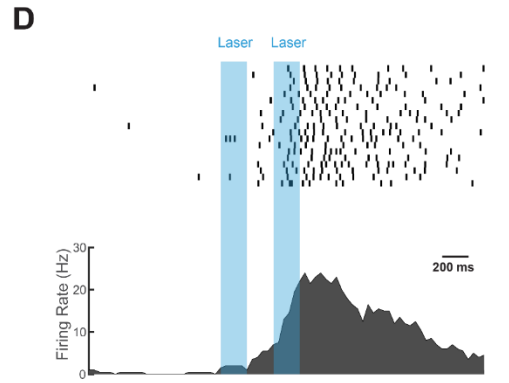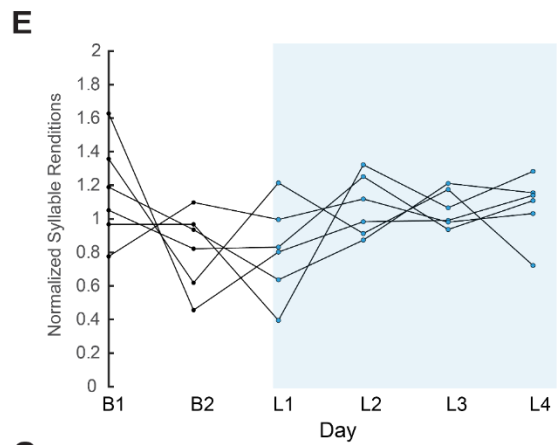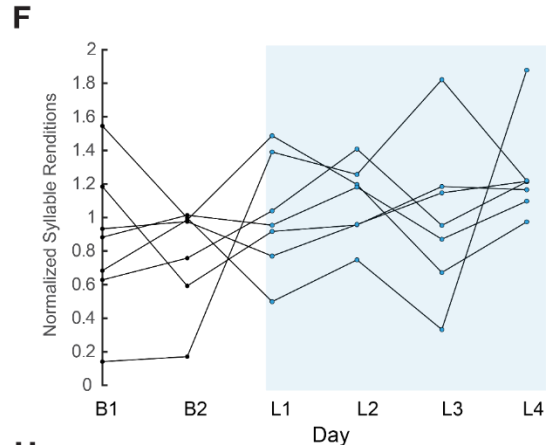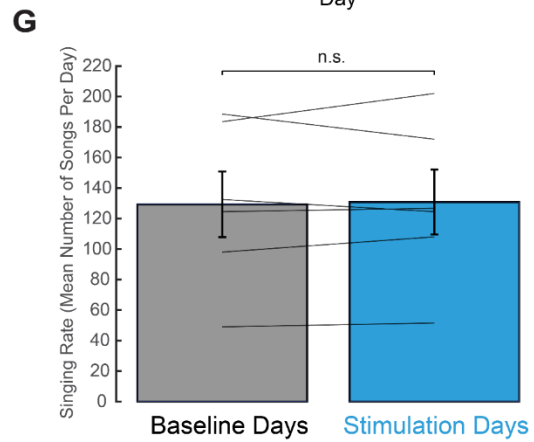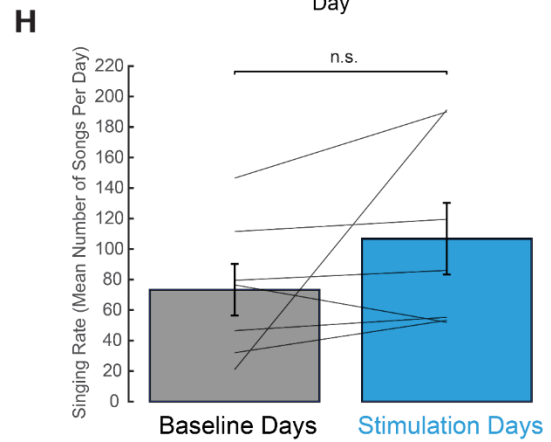

**Supplementary Figure 5: Functional expression of ChR2 in Aiv and VP terminals in VTA and Stimulation of Aiv<sub>VTA</sub>, VP<sub>VTA</sub> does not significantly alter singing rate.**

**Related to Figure 4,5** (A) Top, Laser Pulse delivery (blue). Bottom, 5 trials of recording showing raw activity of recorded VTA unit. (B) Top, Laser Pulse delivery (blue). Bottom, 5 trials of recording showing raw activity of recorded VTA unit. (C) Top, raster plot of sorted spikes on each trial represented with a tick mark. Bottom, Peristimulus Time Histogram (PSTH) showing smoothed firing rate averaged across all trials demonstrating modulations in the firing rate of this VTA unit linked to Aiv terminal stimulation. (D) Top, raster plot of sorted spikes on each trial represented with a tick mark. Bottom, PSTH showing smoothed firing rate averaged across all trials demonstrating modulations in firing rate of this unit linked to VP terminal stimulation. (E) Plot of normalized number of “catch” syllable renditions (set at 5% of total trials) during each of 6 days of the experiment, 2 baseline days (B1, B2, black) and 4 stimulation days (L1, L2, L3, L4, blue), shaded regions indicates days where laser is delivered normalized by the average number of renditions sang by that bird over the six experimental days. (F) Same as in E, except for VP<sub>VTA</sub> Stimulation. (G) Bar graph of singing rate the average number of syllable renditions on two baseline days (gray) and four Aiv<sub>VTA</sub> laser stimulation days (blue) (n = 6 syllables, p = 0.786 paired t test) (H) Same as in E except for VP<sub>VTA</sub> laser stimulation (n = 7 syllables, p = 0.2145 paired t test).

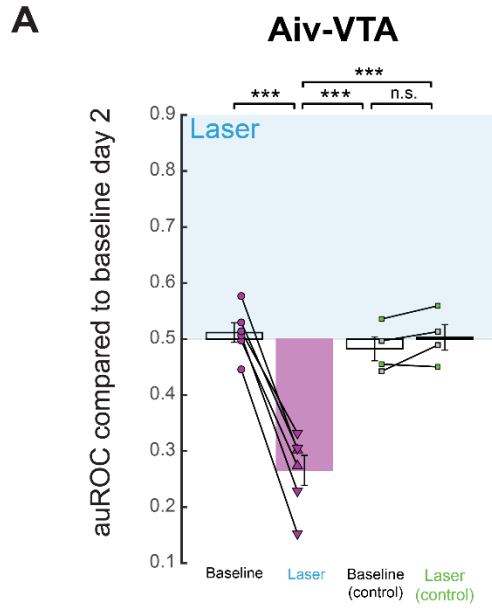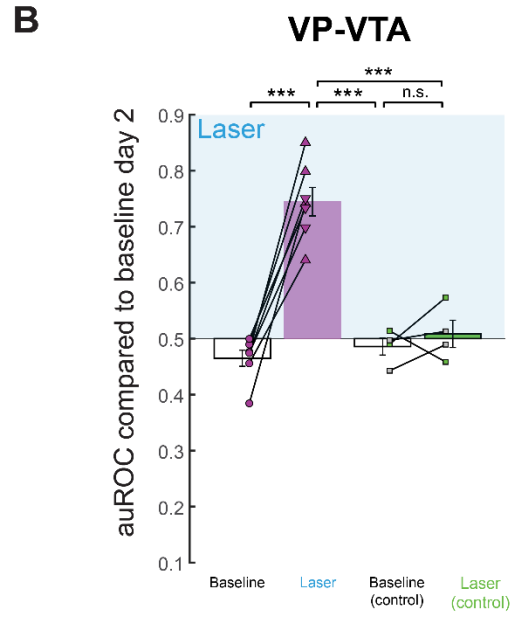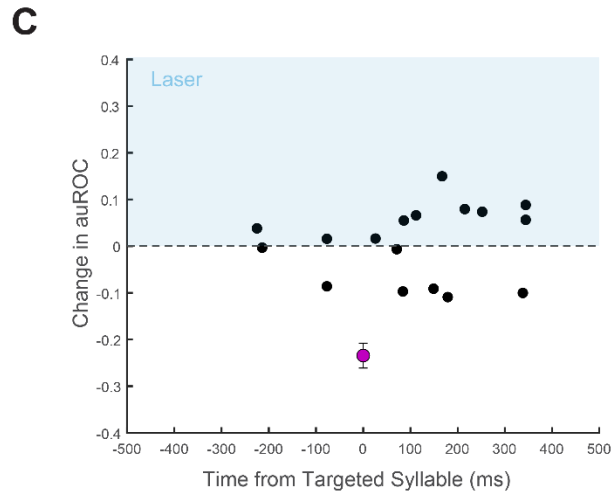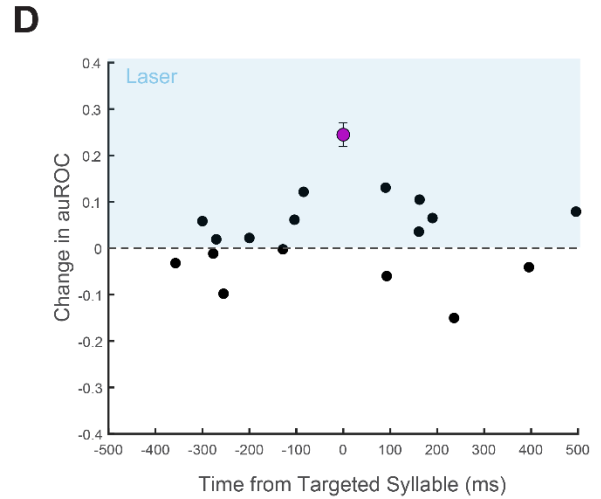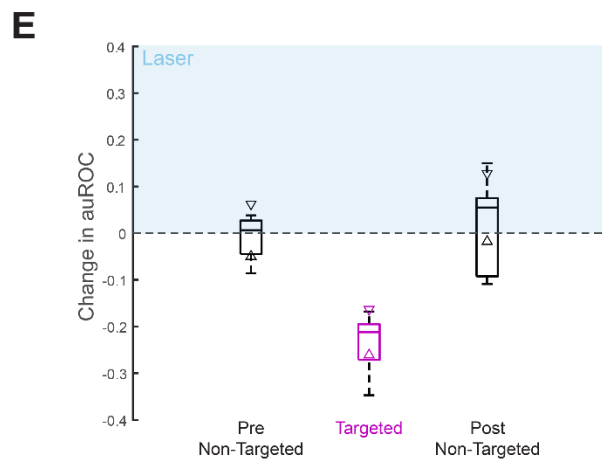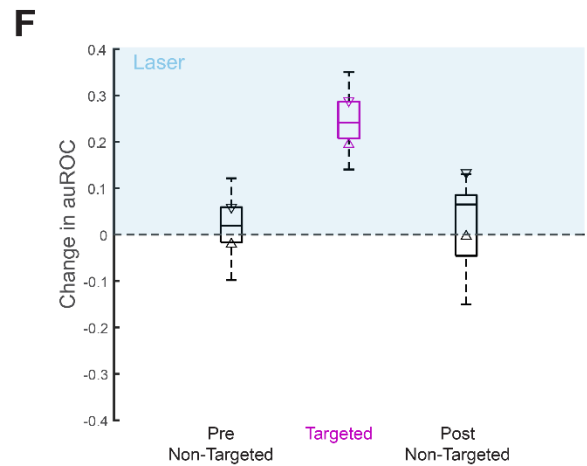

**Supplementary Figure 6: Pitch-contingent optogenetic stimulation of Aiv and VP terminals in VTA drives syllable-specific changes in pitch., Related to Figure 4,5**

(A) Mean change in auROC of target syllable pitch, relative to B2, on B1 (baseline) and L4 (laser) ( $n = 6$  syllables,  $n = 4$  birds,  $p = 0.000032$ , paired t test). Right, same but in control birds (Laser(control)) (green, GFP; gray, no injection,  $n = 4$  syllables, 4 birds;  $p = 0.1476$ , paired t test). (B) Mean change in auROC of target syllable pitch between B1 and B2 (Baseline), and B2 and L4 of VP<sub>VTA</sub> terminal stimulation in experimental birds (Laser) ( $n = 7$  syllables,  $n = 6$  birds,  $p = 0.000044$ , paired t test). Right, same but in control birds (Laser(control)) (green, GFP; gray, no injection,  $n = 4$  syllables, 4 birds;  $p = 0.4993$ , paired t test). (C) Absolute change in auROC of non-targeted syllables for AiV<sub>VTA</sub> stimulation as a function of milliseconds in song in distance from the target syllable ( $n = 17$  non-targeted syllables from  $n = 4$  birds). Negative numbers indicate that the syllable preceded the target syllable. Purple circle indicates the mean and S.E.M. of the absolute change in auROC of all AiV<sub>VTA</sub> targeted syllables. All values shown as mean  $\pm$  standard error of the mean (S.E.M.). (D) Absolute change in auROC of non-targeted syllables for VP<sub>VTA</sub> stimulation as a function of milliseconds in song from the targeted syllable ( $n = 18$  non-targeted syllables from  $n = 4$  birds). Negative numbers indicate that the syllable preceded the target syllable. Purple circle indicates the mean and S.E.M. of the absolute change in auROC of all VP<sub>VTA</sub> targeted syllables. All values shown as mean  $\pm$  standard error of the mean (S.E.M.). (E) Boxplot of change in auROC of non-targeted syllables before the targeted syllable (Pre Non-Targeted), targeted syllables (Targeted, magenta), and non-targeted syllables after the

targeted syllable (Post Non-Targeted) with  $Ai_{VTA}$  stimulation. (F) Same as E except for  $VP_{VTA}$  stimulation.

**A**

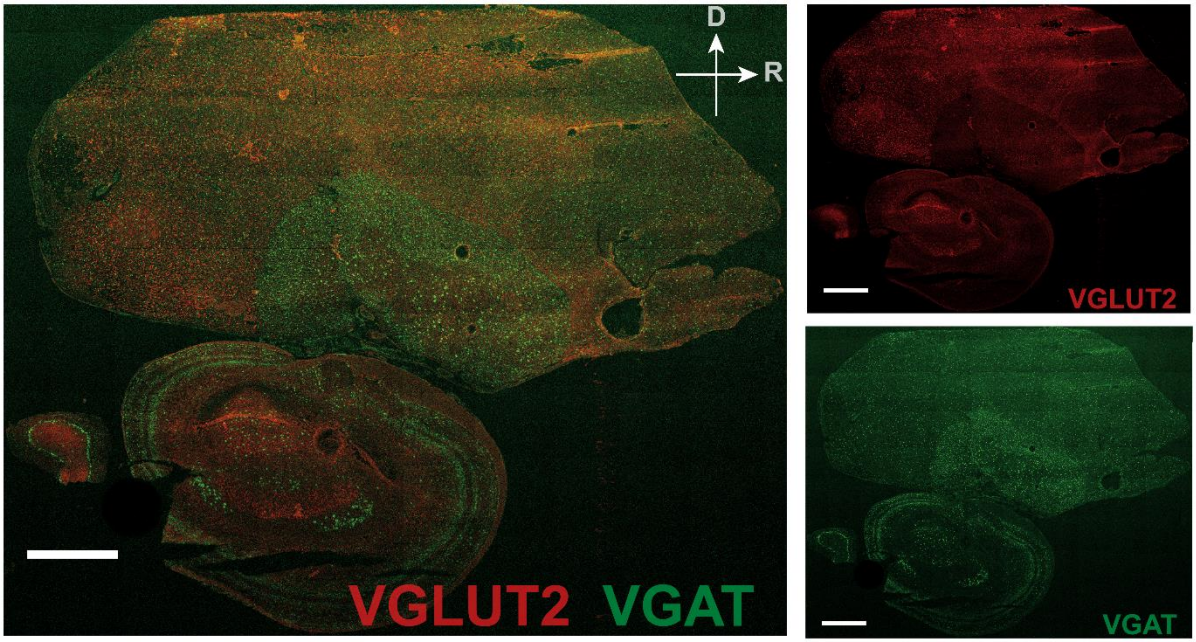

**B**

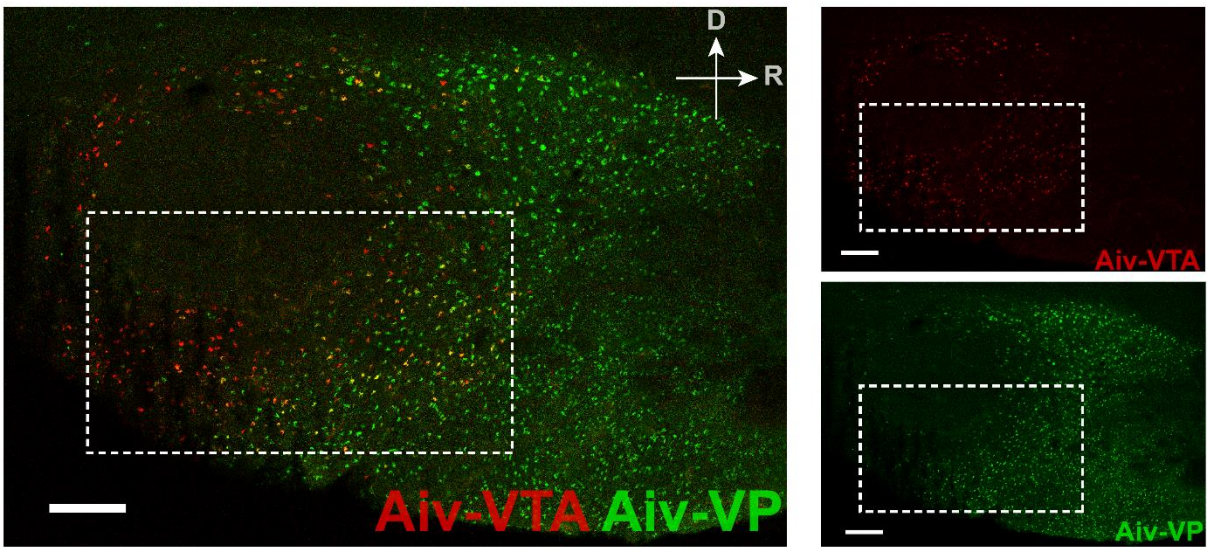

**Supplementary Figure 7: Anatomy and diagram of actor-critic circuit in the**

**songbird., Related to Figure 7** (A) Left, Overlay section of zebra finch brain with fluorescence in situ probe against VGLUT2 (red) and VGAT (green), scale bar 1 mm. Top right, same section with only VGLUT2 (red) channel. Bottom right, same section with only VGAT (green) channel. (B) Left, overlay of arcopallial section of zebra finch brain with CTB injection into VTA (red) and VP (green), scale bar 200  $\mu\text{m}$ . Top right, same section with only Aiv<sub>VTA</sub> (red) channel. Bottom right, same section with only Aiv<sub>VP</sub> (green) channel.

### A "Error" Noise Rendition

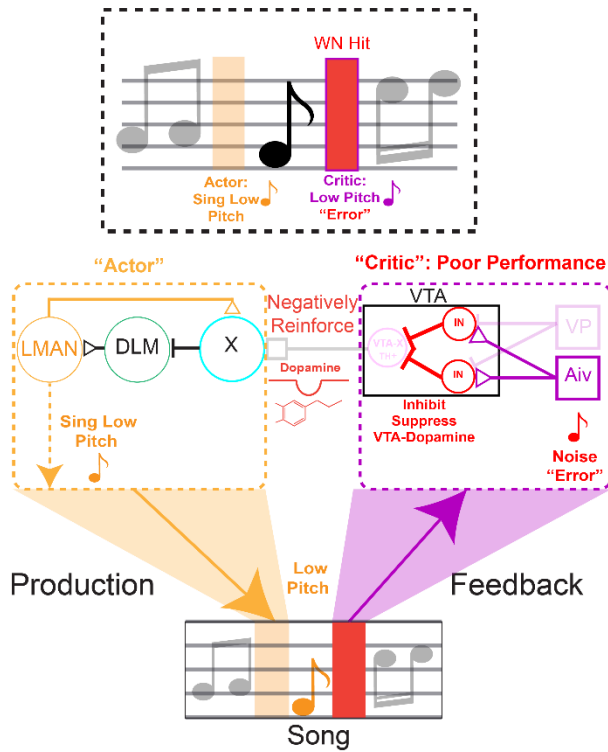

### B "Escape" Successful Rendition

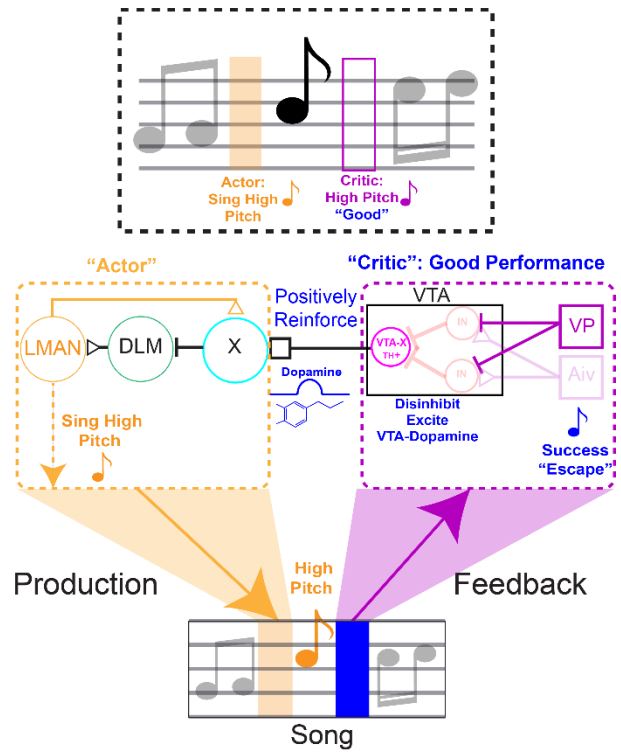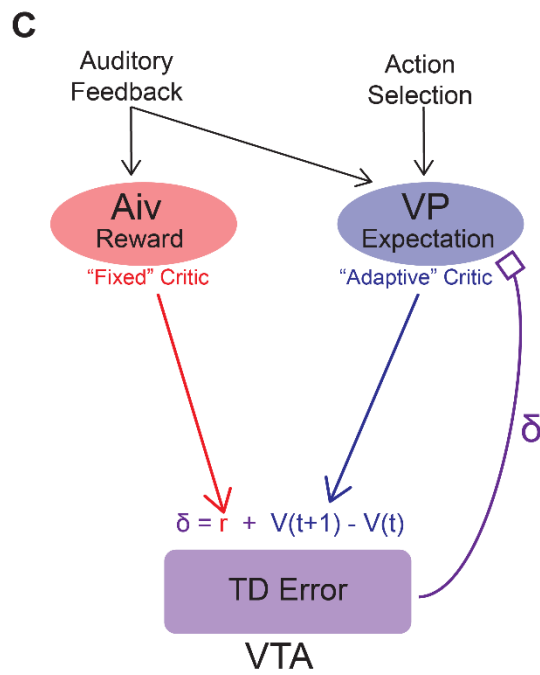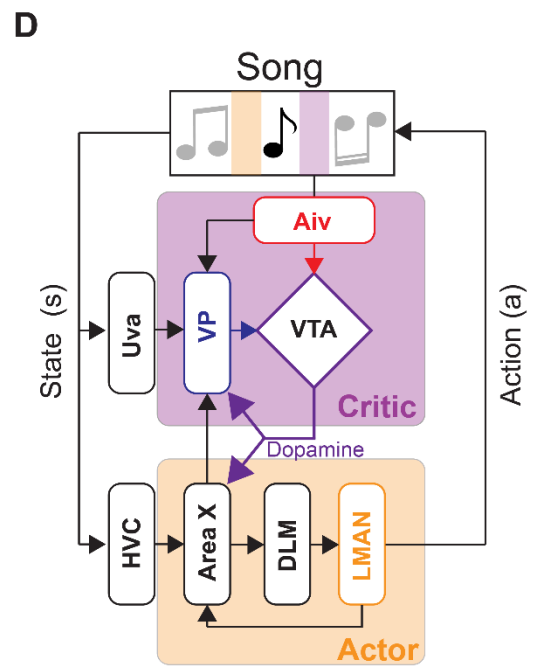



**Supplementary Figure 8: Circuit Models of Pitch Learning., Related to Figure 8 (A)**

Schematic of activity in songbird vocal learning circuit on “error” renditions that received

noise. (E) Schematic of activity in songbird vocal learning circuit on successful

renditions that escape noise. (C) TD error model wherein Aiv is a “fixed” critic conveying

negative reward (vocal error) and VP is an “adaptive” critic conveying an expectation.

These two signals are combined within the local VTA network to compute a TD error.

(D) A hypothetical “actor-critic” circuit architecture that may support vocal learning (with

inspiration from (Takahashi et al., 2008, Chen et al., 2019).

**Supplementary Table 1: VGLUT2 and VGAT Probe Sequence., Related to Figure 7**

|        |                                                                                                                                                                                                                                                                                                                                                                                                                                                                                                                                                                                                                                                                                                                                                                                                                                                                                                                                                                                                                                                                                                                                                                                            |
|--------|--------------------------------------------------------------------------------------------------------------------------------------------------------------------------------------------------------------------------------------------------------------------------------------------------------------------------------------------------------------------------------------------------------------------------------------------------------------------------------------------------------------------------------------------------------------------------------------------------------------------------------------------------------------------------------------------------------------------------------------------------------------------------------------------------------------------------------------------------------------------------------------------------------------------------------------------------------------------------------------------------------------------------------------------------------------------------------------------------------------------------------------------------------------------------------------------|
| VGLUT2 | <p>gctgggattc tggtgcaata tactgggtgg tctctgtgt tctatgata tgggagcttt<br/> ggtatagtct ggtacatggt ttggcttttg gttcatatg agagtctgc aaagcatcct<br/> acaattacag atgaagaaag gagatacata gaagaaagca ttggagagag tgccaacctc<br/> ctaggtgcaa tggaaaaata caaacacca tggagaaaat ttttacatc tatgccagtc<br/> tatgcaataa tagttgcaaa ctctgtaga agctggactt tttactgct gctaattagt<br/> cagcctgctt actttgagga agtgtttga ttgaaataa gcaaggtggg tattttatct<br/> gctgtgccac atttagtgt gacaattatt gttcctattg ggggacaaat tgccgacttt<br/> ttaagaagca ggcagattgt ttcaacgact aatgtgagaa agataatgaa ctgtggaggt<br/> tttggtatgg aagcaactct tctctggtg gtgggatatt cacacagcaa aggagtggct<br/> attcattct tagtgcttgc ttaggcttt agtggattg ccatatctgg attcaatgc<br/> aaccatttag acattgcccc aaggatgct agcatttaa tggggatttc taatggagtc<br/> gggacctgt ctggaatggt ttgccctata attgttgag caatgacaaa gaacaagaca<br/> cgtgaagaat ggcagtatgt ctctcatt gctgcttag tccattatgg aggtgtgac<br/> ttctatggca tatttcttc <b><i>accctatagt agtcgtatt acgcgcg</i></b></p>                                                                                                                                                                                  |
| VGAT   | <p>ccaacgceat ccaggggatg tttgttctgg gctgcecta tgccatcctt cacggtggat<br/> acctaggact cttttaata atttcctg cagtggttg ctgctacact gggaaaatcc<br/> ttattgctg tctttacgaa gagaatgagg atggggagat agtcagggtg agagactcct<br/> acgtggacat tgcgaacgcg tctgctgcgc cccgcttccc caccctcggg ggcagaattg<br/> tcaactggc tcagatcatt gaactggta tgacctgcat cctctatgtg gtggtcagt<br/> ggaacctgat gtacaacage ttcccaacc tgcccgtctc ccagaagtcg tggccatca<br/> ttgccacggc agtgctctg cttgtgctt tctgaagaa cctcaaggca gtctccaagt<br/> tcagcttget ctgcacatta gccactttg teatcaacat cctggtgac gctactgcc<br/> tctccagggc gcgcgactgg gctgggaca aagtcaagt ttacattgat gcaagaagt<br/> ttccatctc cattggcacc attgtctca gctacacct ccagatctt ctgccttct<br/> tggaggggaa catgcagaac cccaaggagt ttactgcat gatgaactgg actcacatag<br/> cagcttgcac ccttaaggga ctctttgct tggctgccta cctgacctgg gctgatgaga<br/> ccaaggaggt cattacagac aacttgccat ccaccattag ggcagtagtc aatatttct<br/> tgggtggcaa agccttctc tegtacctc tggcgttct tgcagctgta gaagtctgg<br/> agcgatccct ttccaagat ggaacaggg ctcttctccc caactgctat gggggtgacg<br/> ggcggctcaa atctgggga ctaccctca gatgtgccct ggtagtttc acctgctca<br/> <b><i>ccctatagt agtcgtatta cgcgcg</i></b></p> |

Bold and italic sequence: T7 binding site
